# Supplementary material for: Effect of a Salutogenic Program on Depression, Self-harming Behaviour and Sense of Coherence among Elderly Residents of an Old Age Home in Odisha
Source: Research Square preprint supplement (doi:10.21203/rs.3.rs-7268998/v1), 2025-09-23
Supplement: Supplementary file 1 [file 0f5f6260d4f7c7ac249f239d.docx]

**Effect of a Salutogenic Program on Depression, Self-harming Behaviour and Sense of Coherence among Elderly Residents of an Old Age Home in Odisha**

**Author Name and Affiliation (In sequence):**

| **Author order** | **Author Name (First name, Middle name initial followed by Family name)** | **ORCID NO.** | **Affiliation (Department, Institution, City, State, Country)** |
| --- | --- | --- | --- |
| 1 | **Ishita Sahoo** | 0000-0002-6377-6151 | Assistant Professor, Dept.of Mental Health Nursing, SUM Nursing College, Siksha ‘O’ Anushandhan University, Bhubaneswar, Odisha. Mail.id- [sishitab37@gmail.com](mailto:sishitab37@gmail.com), Phn no- 8250650552 |
| 2* | Suchismita Pahantasingh | 0000-0003-1367-2693 | Associate Professor, Department of mental health nursing, SUM Nursing College, Siksha ‘O’ Anushandhan University, Bhubaneswar, Odisha. Mail Id: [suchismitapahantasingh@soa.ac.in](mailto:suchismitapahantasingh@soa.ac.in), phn no- 8763247057 |
| 3 | Sephali Moharana | 0009-0009-3150-9188 | Assistant Professor, Department of mental health nursing, SUM Nursing College, Siksha ‘O’ Anushandhan University, Bhubaneswar, Odisha. Mail Id: [sephalimoharana@soa.ac.in](mailto:sephalimoharana@soa.ac.in), phn no- 8763021112 |

**ABSTRACT**

**Objective:** This study sought the impact of the Salutogenic Program on depression, self- harming behaviour and Sense of coherence among elderly individual living in an Old-age home of Bhubaneswar, Odisha.

**Methods &Materials:** In this study Quantitative Research approach and Quasi- experimental design was acquired. A number of 40 elderly (aged ≥60yrs) locating at M.P Old age home and Geriatric Centre, Bhubaneswar were sorted out for experimental group (N=28) and control (N=12) group by applying Purposive Sampling technique. Basic informations were gathered by applying Socio demographic data Proforma, Geriatric depression scale, Modified self-harm inventory scale and Modified Sense of coherence scale, after obtaining written informed consent from every participant. Total 4 weeks of (5session per week) Salutogenic Program for 120 minutes was given to elderly by splitting the experimental group into 4 groups.

**Results**: Analysis disclosed that after Salutogenic Program, using inferential statistics, the experimental group displayed that depression level was decreased (before intervention 8.43 ± 3.120 and after intervention 5.04 ± 1.732), self-harming behaviour was reduced (before intervention 8.64 ± 2.329 and after intervention 5.14 ± 1.53) and Sense of coherence was increased (before intervention 49.36 ± 9.15 and after intervention 60.82 ± 4.68). A statistically significant difference (p<0.0001) was observed in the scores of depression, self-harming behaviour and Sense of coherence in the experimental group compared to the control group.

**Conclusion:** Present study concluded that Salutogenic Program is effective in decreasing level of depression and self-harming behavior and increasing sense of coherence among older adults in selected old-age home.

**Trial registration**: Registration number- SOADU/SNC/Acad-117/67/21

Registration Date- 26/07/2021

Place- M.P Old-Age Home, Rasulgarh, Bhubaneswar, Odisha, India

**Keywords:** Depression, Elderly, Self-harming behaviour, Sense of coherence, Salutogenic Program.

**Author Contribution:** Ms. Ishita had full access to all data in the study and take responsibility for the integrity of the data and the accuracy of the data analysis. Study concept and design: Ms. Suchismita. Statistical analysis: Ms. Ishita & Ms. Sephalu. Drafting of the manuscript: Ms. Sephali & Ms. Ishita. Revision of the manuscript: Ms. Suchismita & Ms. Sephali. All authors read and approved the final manuscript.
